# Supplementary material for: FIERY1 promotes microRNA accumulation by suppressing rRNA-derived small interfering RNAs in Arabidopsis
Source: PubMed Central journal article supplement (PMC6765019; doi:10.1038/s41467-019-12379-z), 2019-09-27
Supplement: 41467_2019_12379_MOESM3_ESM.pdf [file 41467_2019_12379_MOESM3_ESM.pdf]

## **Description of Additional Supplementary Files**

File Name: Supplementary Data 1

Description: Abundance of annotated miRNAs in fry1 and WT

File Name: Supplementary Data 2

Description: Hyper and hypo 21-nt DSRs in fry1

File Name: Supplementary Data 3

Description: Hyper and hypo 21-nt DSGs in fry1

File Name: Supplementary Data 4

Description: Overlap in genes with excess 21-nt siRNAs among different genotypes and statistical evaluation of significance of overlap

File Name: Supplementary Data 5

Description: Predicted targeting of DSGs by miRNAs

File Name: Supplementary Data 6

Description: Reads from sRNA-seq from immunoprecipitated AGO1 and AGO2 in fry1-6, fry1-6 rdr6-11, and WT

File Name: Supplementary Data 7

Description: Annotated miRNAs in input and AGO1 IP products from fry1-6, fry1-6 rdr6-11, and WT

File Name: Supplementary Data 8

Description: Annotated miRNAs in input and AGO2 IP products from fry1-6, fry1-6 rdr6-11, and WT

File Name: Supplementary Data 9

Description: Oligonucleotides used in this study
